# Supplementary material for: Immune monitoring and TCR sequencing of CD4 T cells in a long term responsive patient with metastasized pancreatic ductal carcinoma treated with individualized, neoepitope-derived multipeptide vaccines: a case report
Source: Springer Nature journal article supplement (doi:10.1186/s12967-018-1382-1), 2018-02-06
Supplement: MOESM1 [file 15443002]

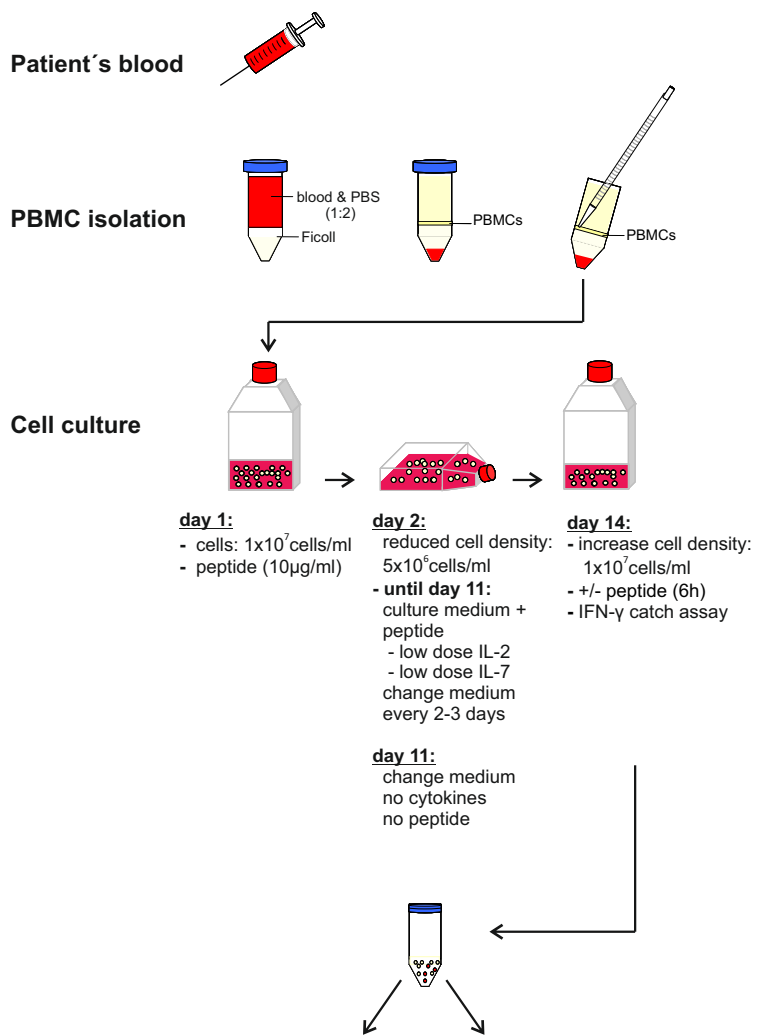

**IFN- $\gamma$  Secretion Assay Kit (PE) (Miltenyi Biotech Germany)**

| IFN- $\gamma$ <sup>-</sup><br>vaccine non-specific T cells                          | IFN- $\gamma$ <sup>+</sup><br>peptide specific T cells                               |
|-------------------------------------------------------------------------------------|--------------------------------------------------------------------------------------|
|  |  |
| +                                                                                   | +                                                                                    |
| +                                                                                   | +                                                                                    |
| +                                                                                   | +                                                                                    |
| -                                                                                   | +                                                                                    |
| -                                                                                   | +                                                                                    |
| -                                                                                   | +                                                                                    |

FACS analysis  
 TCR spectratyping  
 CDR3 sequencing  
 cloning  
 TCR heterodimer identification  
 gene expression analysis  
 (perforin, GrzB, CRTAM, T-bet, Foxp3, RORC)
