# Supplementary material for: Immune monitoring and TCR sequencing of CD4 T cells in a long term responsive patient with metastasized pancreatic ductal carcinoma treated with individualized, neoepitope-derived multipeptide vaccines: a case report
Source: Springer Nature journal article supplement (doi:10.1186/s12967-018-1382-1), 2018-02-06

# TCR variable segments of locus (before immune monitoring)

## TCR $\alpha$

## TCR $\beta$

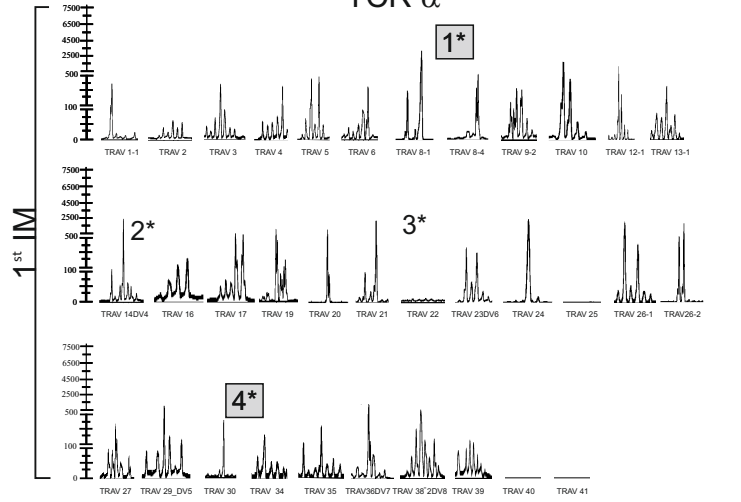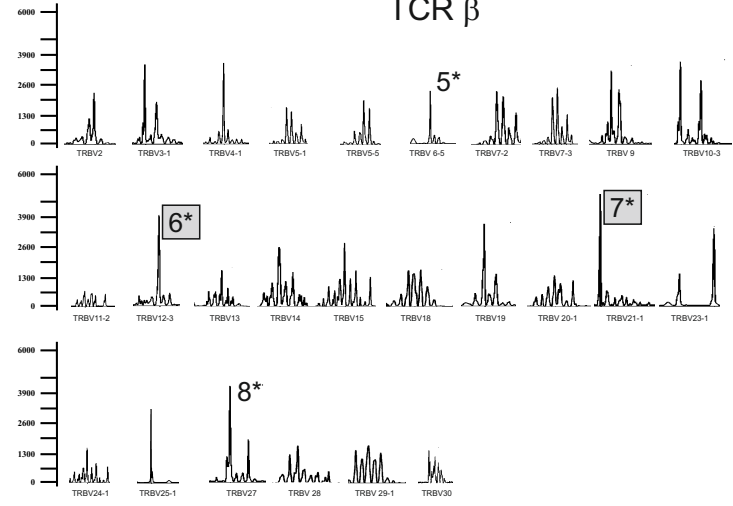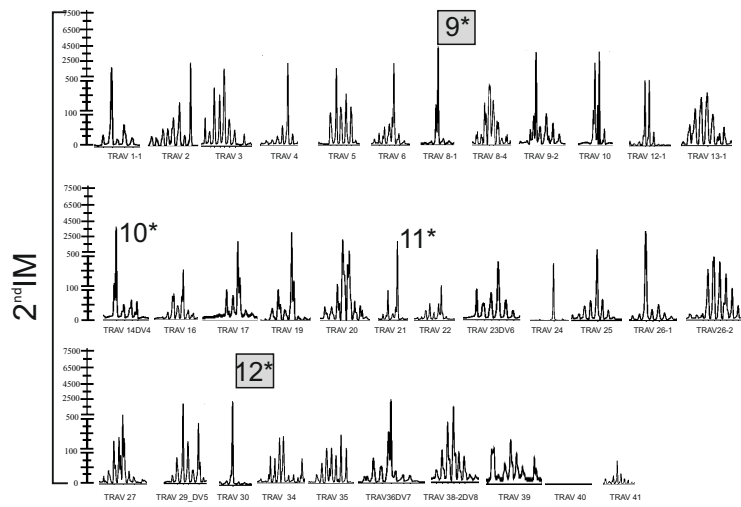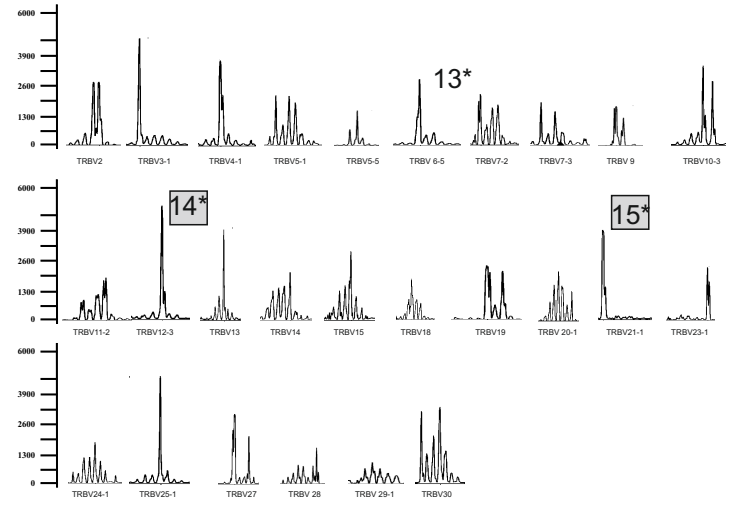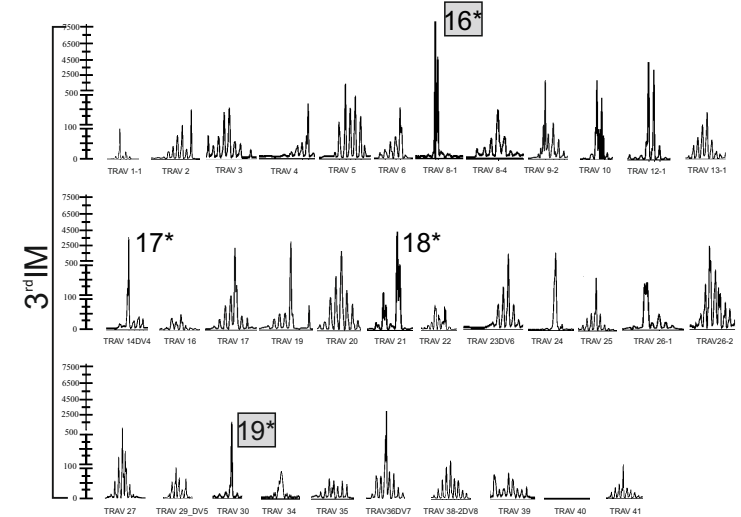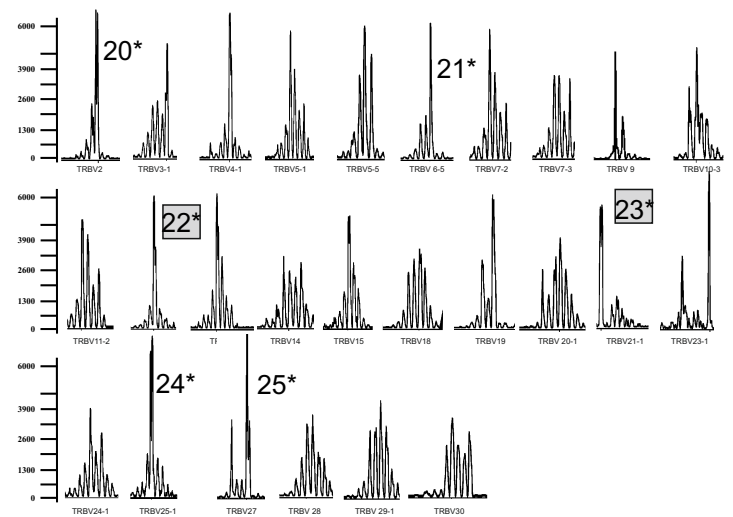

Supplement: MOESM2 [file 15443002]
