# Supplementary material for: Immune monitoring and TCR sequencing of CD4 T cells in a long term responsive patient with metastasized pancreatic ductal carcinoma treated with individualized, neoepitope-derived multipeptide vaccines: a case report
Source: Springer Nature journal article supplement (doi:10.1186/s12967-018-1382-1), 2018-02-06
Supplement: MOESM5 [file 15443002]

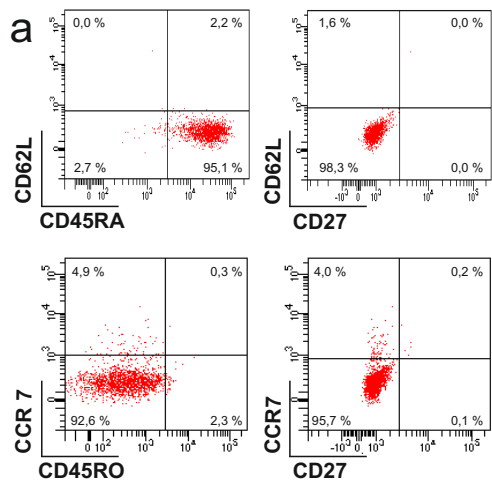

$T_{em}$ : CD45RA<sup>+</sup>, CD45RO<sup>-</sup>, CD62L<sup>+</sup>, CCR7<sup>+</sup>, CD27<sup>+</sup>

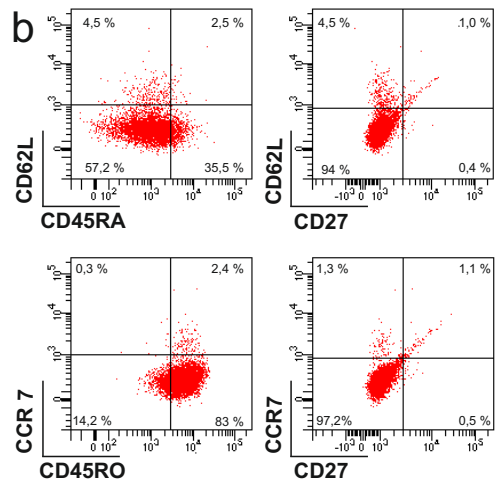

$T_{eff}$ : CD45RA<sup>-</sup>, CD45RO<sup>+</sup>, CD62L<sup>+</sup>, CCR7<sup>-</sup>, CD27<sup>+</sup>
